# Supplementary material for: A retinoic acid–dependent network in the foregut controls formation of the mouse lung primordium
Source: JCI journal article supplement (doi:10.1172/jci40253), 2010-05-20
Supplement: sd1 [file 1]

**A**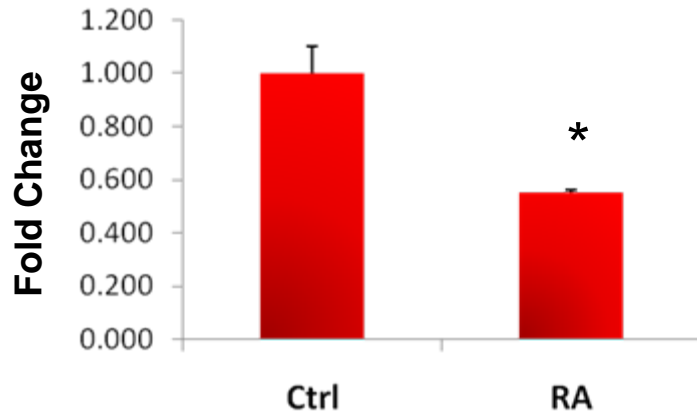**B**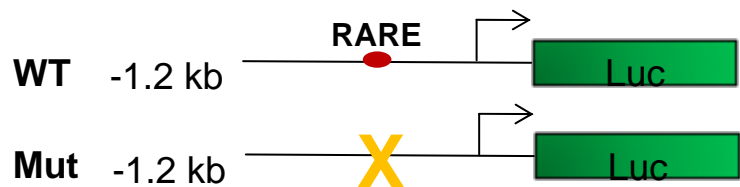**C**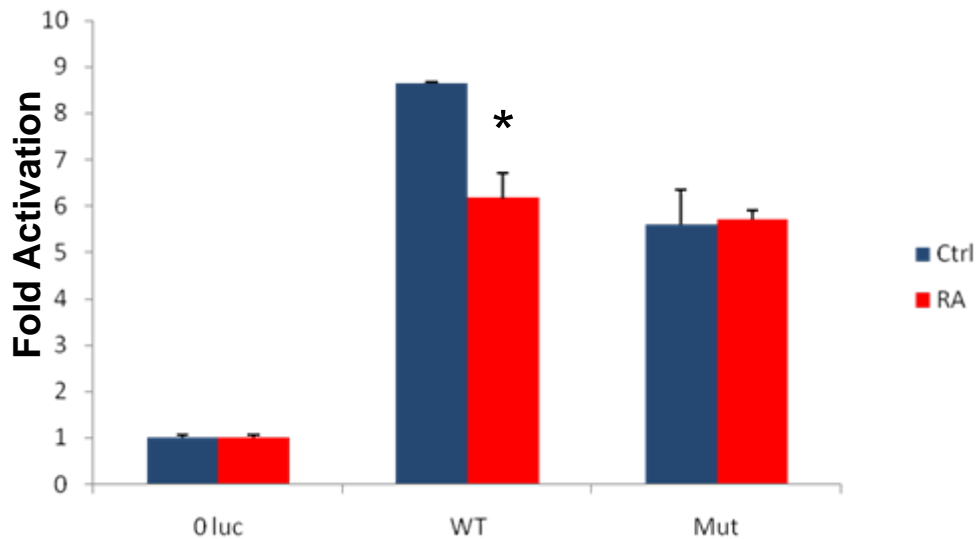**Supplemental Figure 1.**

***Dkk1* is a direct target of RA in MLg cells.** (A) Real-time PCR showing reduced *Dkk1* levels in RA-treated MLg cells compared with the untreated cells. (B-C) The genomic sequence 1212 bp 5' of mouse *Dkk1* translation start site contains one RA responsive element (RARE). Transcriptional activity of the *Dkk1* promoter-luciferase transiently transfected in MLg cells is reduced in RA-treated cells compared with the untreated cells. This reduction is abolished when the RARE in the *Dkk1* promoter-luciferase is mutated (C). Asterisk:  $p < 0.05$
